# Supplementary material
Source: PubMed Central journal article supplement (PMC5216427)
Supplement: CVI.00456-16_zcd999095429s3.pdf [file CVI.00456-16_zcd999095429s3.pdf]

### **Supplementary videos 1 to 3**

**Opsonophagocytosis (Video S1).** Three video clips for phagocytosis of K1-Kp pH-Rhodo-labeled cells by J744.16 are 2h played at 5 fps, showing treatment with PBS, 4C5 or 19A10.

**Intravital microscopy (Videos S2 and S3).** Video S2: Three video clips for i.v injection are all 30 min post infection played at 5 fps, showing treatment with 4C5, 19A10 or PBS. Video S3: Three video clips for i.p infection are 24 h post infection played at 5 fps showing treatment with 4C5, 19A10 or PBS.
